# Supplementary material for: Hypothesis driven single cell dual oscillator mathematical model of circadian rhythms
Source: PLoS One. 2017 May 9;12(5):e0177197. doi: 10.1371/journal.pone.0177197 (PMC5423656; doi:10.1371/journal.pone.0177197)
Supplement: S4 Text — (DOCX) [file pone.0177197.s019.docx]

**S4 Text. Coupled oscillator model for morning and evening oscillators**

**M oscillator**

**E oscillator**

**AVP and VIP**
